# Supplementary material
Source: publisher figshare collection journal article supplement (https://acs.figshare.com/ndownloader/files/5101207)
Supplement: Supplementary file 1 [file 5101207]

---

### Copper-Catalyzed Allylation of Carbonyl Derivatives Using Allyl(2-pyridyl)silanes

Toshiyuki Kamei, Kazuyoshi Fujita, Kenichiro Itami,\* and Jun-ichi Yoshida\*

*Department of Synthetic Chemistry & Biological Chemistry, Graduate School of Engineering,  
Kyoto University, Nishikyo-ku, Kyoto 615-8510, Japan*

---

**General.**  $^1\text{H}$  and  $^{13}\text{C}$  NMR spectra were recorded on Varian GEMINI-2000 ( $^1\text{H}$  300 MHz,  $^{13}\text{C}$  75 MHz) and Varian MERCURYplus-400 ( $^1\text{H}$  400 MHz,  $^{13}\text{C}$  100 MHz) spectrometers in  $\text{CDCl}_3$  or  $\text{CD}_3\text{CN}$  with chemical shifts referenced to internal standards ( $\text{CDCl}_3$  7.26 ppm  $^1\text{H}$ , 77.0 ppm  $^{13}\text{C}$  or  $\text{CD}_3\text{CN}$  1.94 ppm  $^1\text{H}$ , 118.1 ppm  $^{13}\text{C}$ ). IR spectra were recorded on Shimadzu FTIR-8100 spectrophotometer. EI and CI mass spectra were recorded on a JMS-SX102A spectrometer. FAB mass spectra were recorded on a JMS-HX110A spectrometer. Unless otherwise noted, all materials and anhydrous tetrahydrofuran (THF) were obtained from commercial suppliers and used without further purification.  $\text{CuCl}$  (Nacalai Tesque, Inc.) and  $\text{CuBr}$  (Wako Pure Chemical Industries Ltd.) were used without further purification.  $\text{CuI}$  was recrystallized from  $\text{H}_2\text{O}/\text{NaI}$  prior to use. Compound **8**,<sup>1</sup>  $\beta$ -styryl iodide,<sup>2</sup>  $\alpha$ -styryl iodide,<sup>3</sup> (*E*)-hexenyl iodide,<sup>4</sup> (2-iodoethenyl)cyclohexane,<sup>5</sup> ethyl (*E*)-2-iodo-3-phenyl-2-propenoate<sup>6</sup> and acetone *N*-benzylimine<sup>7</sup> were prepared according to the literature procedure.

#### Allyldimethyl(2-pyridyl)silane (**1**)

To a solution of 2-bromopyridine (3.16 g, 20 mmol) in dry  $\text{Et}_2\text{O}$  (20 mL) was added dropwise a solution of *n*-BuLi (21 mmol, 1.54 M solution in hexane) at  $-78^\circ\text{C}$  under argon. The mixture was stirred for additional 1 h to afford an ether solution of 2-pyridyllithium. To this solution was added allylchlorodimethylsilane (3.0 g, 22 mmol) at  $-78^\circ\text{C}$ . After being stirred at room temperature for 2 h, the reaction mixture was quenched with  $\text{H}_2\text{O}$  (30 mL). Aqueous phase was extracted with  $\text{Et}_2\text{O}$  (3 x 30 mL), and the combined organic phase was washed with brine (50 mL). Drying over  $\text{MgSO}_4$ , removal of the solvents under the reduced pressure and subsequent distillation (bp  $104\text{--}105^\circ\text{C}/18.3\text{ mmHg}$ ) afforded the title compound (2.45 g, 69%) as a colorless oil.  $^1\text{H}$  NMR (300 MHz)  $\delta$  0.33 (s, 6H), 1.84 (dt,  $J = 8.1, 1.2$  Hz, 2H), 4.83 (dm,  $J = 10.2$  Hz, 1H), 4.86 (dm,  $J = 16.8$  Hz, 1H), 5.78 (ddt,  $J = 16.8, 10.2, 8.1$  Hz, 1H), 7.19 (ddd,  $J = 7.5, 4.8, 1.5$  Hz, 1H), 7.48 (dt,  $J = 7.8, 1.2$  Hz, 1H), 7.58 (td,  $J = 7.5, 1.5$  Hz, 1H), 8.77 (ddd,  $J = 5.1, 1.8, 1.2$  Hz, 1H);  $^{13}\text{C}$  NMR (75 MHz)  $\delta$   $-4.1, 22.7, 113.5, 122.8, 129.2, 133.9, 134.4, 150.1, 166.8$ ; IR (neat) 2990, 2959, 1630, 1417, 1248  $\text{cm}^{-1}$ . HRMS (CI)  $m/z$  calcd for  $\text{C}_{10}\text{H}_{15}\text{NSi}$  ( $\text{MH}^+$ ): 178.1052 found 178.1054.

**Typical procedure for the copper-mediated cross-coupling reaction of 5 with alkenyl iodide 6 (Table 2, Figure 2, Li method).** To a solution of trimethyl(2-pyridyl)silane (36.0 mg, 0.24 mmol) in dry Et<sub>2</sub>O (0.3 mL) was added dropwise a solution of *t*-BuLi (0.20 mmol, 1.32 M solution in pentane) at –78 °C under argon. The mixture was stirred for additional 30 min to afford an orange ether solution of (2-pyridyldimethylsilyl)methyl lithium (5). To this solution were added CuBr (17.2 mg, 0.12 mmol) and dry Et<sub>2</sub>O (0.2 mL), and the resultant mixture was stirred at –78 °C for 0.5 h and at room temperature for 0.5 h to afford a black suspension of bis[(2-pyridyldimethylsilyl)methyl]cuprate.  $\alpha$ -Styryl iodide (45.5 mg, 0.20 mmol) was added to this mixture. After the mixture was stirred at room temperature for 4 h, sat. aq NH<sub>4</sub>Cl (2 mL) was added to the reaction mixture. The aqueous layer was extracted with EtOAc (2 mL  $\times$  3), and the combined organic phase was dried over MgSO<sub>4</sub>. Removal of solvents and subsequent silica gel chromatography (hexane/EtOAc/Et<sub>3</sub>N = 100/10/1) afforded **7** (38.7 mg, 77%).

**Typical procedure for the copper-mediated cross-coupling reaction of 8 with alkenyl iodide (Scheme 2, Figure 2, Sn Method).** To a solution of **8** (140.0 mg, 0.32 mmol) and  $\alpha$ -styryl iodide (47.2 mg, 0.21 mmol) in dry dioxane (2.0 mL) was added CuCl (29.6 mg, 0.30 mmol). After the mixture was stirred at 100 °C (reflux) for 4 h, 1,8-diazabicyclo[5.4.0]undec-7-ene (ca. 0.1 mL) and Et<sub>2</sub>O (1.0 mL) were added to the mixture. The copper salt and tin residue were removed by filtration through a short silica gel pad (Et<sub>2</sub>O). Removal of solvents under reduced pressure and subsequent silica gel chromatography (hexane/EtOAc/Et<sub>3</sub>N = 100/10/1) afforded **7** (36.4 mg, 70%).

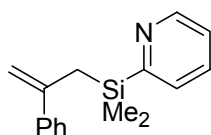

<sup>1</sup>H NMR (400 MHz)  $\delta$  0.23 (s, 6H), 2.36 (s, 2H), 4.87 (d, *J* = 1.2 Hz, 1H), 5.14 (d, *J* = 1.2 Hz, 1H), 7.15 (ddd, *J* = 7.6, 4.8, 1.6 Hz, 1H), 7.18–7.25 (m, 3H), 7.34 (dm, *J* = 7.6 Hz, 2H), 7.36 (dt, *J* = 7.6, 1.2 Hz, 1H), 7.50 (td, *J* = 7.6, 1.6 Hz, 1H), 8.74 (ddd, *J* = 5.2, 1.6, 1.2 Hz, 1H); <sup>13</sup>C NMR (100 MHz)  $\delta$  –3.4, 24.3, 110.8, 122.6, 126.2, 127.0, 127.8, 129.0, 133.6, 142.2, 145.6, 149.8, 166.7. IR (neat) 3056, 2959, 1615, 1418, 1248 cm<sup>–1</sup>. HRMS (EI) *m/z* calcd for C<sub>16</sub>H<sub>19</sub>NSi: 253.1287, found 253.1284.

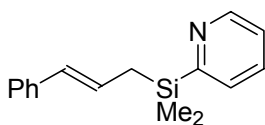

<sup>1</sup>H NMR (400 MHz)  $\delta$  0.40 (s, 6H), 2.03 (dd, *J* = 4.0, 2.4 Hz, 2H), 6.19–6.29 (m, 2H), 7.16 (td, *J* = 8.8, 4.4 Hz, 1H), 7.22 (ddd, *J* = 7.6, 4.8, 1.6 Hz, 1H), 7.26 (s, 2H), 7.27 (s, 2H), 7.51 (dt, *J* = 7.6, 1.2 Hz, 1H), 7.59 (td, *J* = 7.6, 1.6 Hz, 1H), 8.81 (ddd, *J* = 4.8, 1.6, 1.2 Hz, 1H); <sup>13</sup>C NMR (100 MHz)  $\delta$  –3.7, 22.1, 122.8, 125.4, 126.1,

126.8, 128.2, 128.9, 129.1, 133.8, 138.2, 150.0, 166.5. IR (neat) 3023, 2957, 1640, 1418, 1246  $\text{cm}^{-1}$ . HRMS (EI)  $m/z$  calcd for  $\text{C}_{16}\text{H}_{19}\text{NSi}$ : 253.1287, found 253.1288.

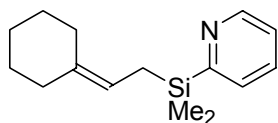

$^1\text{H}$  NMR (400 MHz)  $\delta$  0.33 (s, 6H), 1.33–1.39 (m, 2H), 1.42–1.52 (m, 4H), 1.74 (d,  $J$  = 8.8 Hz, 2H), 2.00–2.06 (m, 4H), 5.09 (t,  $J$  = 8.4 Hz, 1H), 7.19 (ddd,  $J$  = 7.6, 4.8, 1.6 Hz, 1H), 7.48 (dt,  $J$  = 7.6, 1.2 Hz, 1H), 7.56 (td,  $J$  = 7.6, 1.6 Hz, 1H), 8.76 (ddd,  $J$  = 4.8, 1.6, 1.2 Hz, 1H);  $^{13}\text{C}$  NMR (100 MHz)  $\delta$  –3.6, 16.0, 27.1, 27.6, 28.5, 28.9, 37.4, 115.6, 122.6, 129.1, 133.6, 137.8, 149.9, 167.2. IR (neat) 2926, 1576, 1447, 1418, 1246  $\text{cm}^{-1}$ . HRMS (EI)  $m/z$  calcd for  $\text{C}_{15}\text{H}_{23}\text{NSi}$ : 245.1599, found 245.1592.

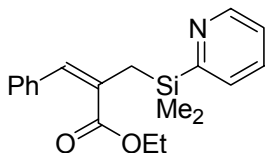

$^1\text{H}$  NMR (400 MHz)  $\delta$  0.02 (s, 6H), 0.63 (t,  $J$  = 7.6 Hz, 3H), 1.82 (s, 2H), 3.57 (q,  $J$  = 7.6 Hz, 2H), 6.02 (s, 1H), 6.69 (dm,  $J$  = 7.6 Hz, 2H), 6.76–6.85 (m, 4H), 7.11 (dt,  $J$  = 7.6, 1.2 Hz, 1H), 7.18 (td,  $J$  = 7.6, 1.6 Hz, 1H), 8.37 (ddd,  $J$  = 4.8, 1.6, 1.2 Hz, 1H);  $^{13}\text{C}$  NMR (100 MHz)  $\delta$  –3.4, 13.8, 24.0, 60.5, 122.8, 126.9, 127.76, 127.81, 129.3, 131.87, 131.92, 133.8, 136.7, 149.9, 166.3, 169.6. IR (neat) 2901, 1717, 1576, 1448, 1211  $\text{cm}^{-1}$ . HRMS (EI)  $m/z$  calcd for  $\text{C}_{19}\text{H}_{23}\text{NO}_2\text{Si}$ : 325.1498, found 325.1497.

**Typical procedure for the copper-catalyzed allylation of carbonyl derivatives using 1.** To a suspension of CuI (4.0 mg, 0.021 mmol, 10 mol %) in dry THF (0.50 mL) were added **1** (47.5 mg, 0.26 mmol), benzaldehyde (**2a**) (23.2 mg, 0.22 mmol), CsF (78.1 mg, 0.51 mmol), and dry THF (0.5 mL). After the mixture was stirred at room temperature for 2 h, 1N HCl aq (1 mL) was added to the reaction mixture. The aqueous layer was extracted with EtOAc (2 mL  $\times$  3), and the combined organic phase was dried over  $\text{MgSO}_4$ . Removal of solvents and subsequent silica gel chromatography (hexane/EtOAc = 5/2) afforded **3a** (27.5 mg, 86%) as colorless oil.

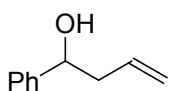

**3a:**<sup>8</sup>  $^1\text{H}$  NMR (400 MHz)  $\delta$  2.05 (brs, 1H), 2.50 (dd,  $J$  = 14.0, 8.0 Hz, 1H), 2.57 (ddd,  $J$  = 14.0, 5.2, 1.2 Hz, 1H), 4.75 (ddd,  $J$  = 8.0, 5.2, 2.8 Hz, 1H), 5.16 (dd,  $J$  = 10.4, 0.8 Hz, 1H), 5.18 (dd,  $J$  = 16.8, 1.2 Hz, 1H), 5.82 (dddd,  $J$  = 16.8, 10.0, 7.2, 6.4 Hz, 1H), 7.26–7.30 (m, 1H), 7.34–7.37 (m, 4H).

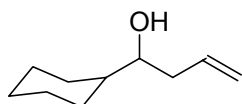

**3b:**<sup>9</sup> <sup>1</sup>H NMR (400 MHz)  $\delta$  1.01–1.17 (m, 2H), 1.19–1.42 (m, 4H), 1.60 (brs, 1H), 1.65–1.72 (m, 2H), 1.73–1.80 (m, 2H), 1.83–1.90 (m, 1H), 2.14 (dt,  $J$  = 14.8, 8.8 Hz, 1H), 2.35 (dm,  $J$  = 14.8 Hz, 1H), 3.40 (td,  $J$  = 9.2, 3.6 Hz, 1H), 5.14 (dm,  $J$  = 11.2 Hz, 1H), 5.15 (dm,  $J$  = 15.2 Hz, 1H), 5.84 (ddt,  $J$  = 16.0, 11.2, 6.0 Hz, 1H).

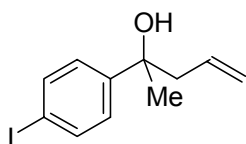

**3c:** <sup>1</sup>H NMR (400 MHz)  $\delta$  1.53 (s, 3H), 2.08 (brs, 1H), 2.48 (dd,  $J$  = 13.6, 8.0 Hz, 1H), 2.65 (dd,  $J$  = 13.6, 6.8 Hz, 1H), 5.137 (dm,  $J$  = 11.6 Hz, 1H), 5.139 (dm,  $J$  = 15.2 Hz, 1H), 5.59 (dddd,  $J$  = 15.2, 11.6, 8.4, 6.4 Hz, 1H), 7.19 (d,  $J$  = 8.4 Hz, 2H), 7.66 (d,  $J$  = 8.8 Hz, 2H); <sup>13</sup>C NMR (100 MHz)  $\delta$  29.9, 48.3, 73.4, 92.1, 119.8, 126.9, 133.0, 137.0, 147.2. IR (neat) 3460, 2977, 1483, 1393, 1005 cm<sup>-1</sup>. HRMS (CI)  $m/z$  calcd for C<sub>11</sub>H<sub>14</sub>OI (MH<sup>+</sup>): 289.0089, found 289.0090.

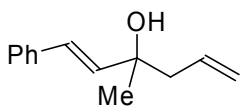

**3d:**<sup>10</sup> <sup>1</sup>H NMR (300 MHz)  $\delta$  1.40 (s, 3H), 1.79 (brs, 1H), 2.37 (dd,  $J$  = 13.5, 8.1 Hz, 1H), 2.46 (dd,  $J$  = 13.8, 6.9 Hz, 1H), 5.176 (dm,  $J$  = 15.9 Hz, 1H), 5.183 (dm,  $J$  = 9.9 Hz, 1H), 5.84 (dddd,  $J$  = 15.6, 11.7, 8.1, 6.6 Hz, 1H), 6.31 (d,  $J$  = 15.9 Hz, 1H), 6.61 (d,  $J$  = 15.9 Hz, 1H), 7.20–7.41 (m, 5H).

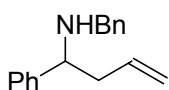

**3e:**<sup>11</sup> <sup>1</sup>H NMR (400 MHz)  $\delta$  1.81 (brs, 1H), 2.41 (dd,  $J$  = 14.4, 8.0 Hz, 1H), 2.47 (dd,  $J$  = 14.4, 6.0 Hz, 1H), 3.54 (d,  $J$  = 13.2 Hz, 1H), 3.69 (d,  $J$  = 12.8 Hz, 1H), 3.71 (dd,  $J$  = 7.6, 6.4 Hz, 1H), 5.05 (dm,  $J$  = 10.4 Hz, 1H), 5.09 (dm,  $J$  = 16.4 Hz, 1H), 5.71 (dddd,  $J$  = 16.4, 10.0, 7.6, 6.0 Hz, 2H), 7.24–7.38 (m, 10H).

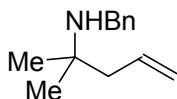

**3f:**<sup>12</sup> <sup>1</sup>H NMR (400 MHz)  $\delta$  1.16 (s, 6H), 2.18–2.19 (br, 1H), 2.26 (d,  $J$  = 7.6 Hz, 2H), 3.72 (s, 2H), 5.119 (d,  $J$  = 15.2 Hz, 1H), 5.121 (d,  $J$  = 10.4 Hz, 1H), 5.88 (ddt,  $J$  = 16.4, 10.4, 7.2 Hz, 1H), 7.23 (tt,  $J$  = 7.2, 1.6 Hz, 1H), 7.29–7.36 (m, 4H).

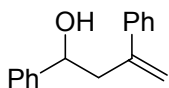

**9a:**<sup>13</sup> <sup>1</sup>H NMR (400 MHz)  $\delta$  2.08 (brs, 1H), 2.87 (dd,  $J$  = 14.4, 9.2 Hz, 1H), 3.04 (ddd,  $J$  = 14.0, 4.4, 1.2 Hz, 1H), 4.74 (ddd,  $J$  = 9.2, 4.4, 2.4 Hz, 1H), 5.19 (d,  $J$  = 1.2 Hz, 1H), 5.43 (d,  $J$  = 1.2 Hz, 1H), 7.26–7.47 (m, 10H).

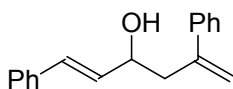

**9g:** <sup>1</sup>H NMR (400 MHz)  $\delta$  1.91 (brs, 1H), 2.81 (ddd,  $J$  = 14.0, 8.0, 0.8 Hz, 1H), 2.93 (ddd,  $J$  = 14.4, 4.8, 1.2 Hz, 1H), 4.37 (dd,  $J$  = 14.0, 6.0 Hz, 1H), 5.24 (d,  $J$  = 1.2 Hz, 1H), 5.45 (d,  $J$  = 1.2 Hz, 1H), 6.23 (dd,  $J$  = 16.0, 6.4 Hz, 1H), 6.55 (d,  $J$  = 16.0 Hz, 1H), 7.22–7.27 (m, 1H), 7.29–7.40 (m, 7H), 7.45 (dm,  $J$  = 8.4 Hz, 2H); <sup>13</sup>C NMR (100 MHz)  $\delta$  44.0, 70.7, 115.7, 126.2, 126.3, 127.4, 127.6, 128.3, 128.4, 130.1, 131.4, 136.5, 140.3, 144.6. IR (neat) 3400, 3026, 2936, 1495, 1447 cm<sup>-1</sup>. HRMS (EI)  $m/z$  calcd for C<sub>18</sub>H<sub>18</sub>O: 250.1357, found 250.1357.

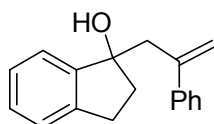

**9h:** <sup>1</sup>H NMR (400 MHz)  $\delta$  1.91 (ddd,  $J$  = 15.2, 8.4, 6.8 Hz, 1H), 2.11 (brs, 1H), 2.20 (ddd,  $J$  = 13.2, 8.0, 4.4 Hz, 1H), 2.73 (dt,  $J$  = 16.0, 7.6 Hz, 1H), 2.92 (ddd,  $J$  = 16.0, 8.4, 4.4 Hz, 1H), 3.02 (d,  $J$  = 14.0 Hz, 1H), 3.14 (d,  $J$  = 14.0 Hz, 1H), 5.18 (d,  $J$  = 0.8 Hz, 1H), 5.42 (d,  $J$  = 0.8 Hz, 1H), 7.17–7.22 (m, 3H), 7.24–7.35 (m, 4H), 7.39–7.42 (m, 2H); <sup>13</sup>C NMR (100 MHz)  $\delta$  29.6, 40.0, 45.5, 83.1, 117.4, 122.8, 124.7, 126.3, 126.4, 127.3, 128.0, 128.2, 142.1, 142.6, 145.0, 147.0. IR(neat) 3410, 3023, 2938, 1624, 1458 cm<sup>-1</sup>. HRMS (EI)  $m/z$  calcd for C<sub>18</sub>H<sub>16</sub>([M–H<sub>2</sub>O]<sup>+</sup>): 232.1252, found 232.1250.

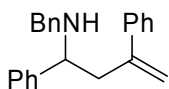

**9e:**<sup>14</sup> <sup>1</sup>H NMR (400 MHz)  $\delta$  1.68 (brs, 1H), 2.78 (dd,  $J$  = 14.0, 9.2 Hz, 1H), 2.91 (dd,  $J$  = 14.0, 4.4 Hz, 1H), 3.38 (d,  $J$  = 13.2 Hz, 1H), 3.62 (d,  $J$  = 13.2 Hz, 1H), 3.69 (dd,  $J$  = 9.2, 4.4 Hz, 1H), 5.08 (d,  $J$  = 1.2 Hz, 1H), 5.31 (d,  $J$  = 1.2 Hz, 1H), 7.10–7.40 (m, 15H).

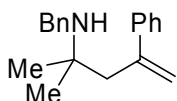

**9f:** <sup>1</sup>H NMR (400 MHz)  $\delta$  1.07 (s, 6H), 1.39 (brs, 1H), 2.77 (s, 2H), 3.67 (s, 2H), 5.14 (d,  $J$  = 0.8 Hz, 1H), 5.32 (d,  $J$  = 0.8 Hz, 1H), 7.15 (dm,  $J$  = 6.8 Hz, 2H), 7.21 (dm,  $J$  = 7.2 Hz, 1H), 7.24–7.35 (m, 5H), 7.41 (dm,  $J$  = 8.4 Hz, 2H); <sup>13</sup>C NMR (100 MHz)  $\delta$  27.9, 46.1, 46.7, 53.7, 117.1, 126.4, 126.5, 127.0, 127.8, 128.1, 128.2,

141.0, 143.3, 146.6. IR (neat) 3318, 2965, 1622, 1493, 1453  $\text{cm}^{-1}$ . HRMS (CI)  $m/z$  calcd for  $\text{C}_{19}\text{H}_{23}\text{N}$  ( $\text{MH}^+$ ): 266.1909, found 226.1911.

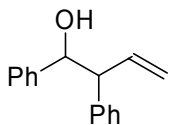

**11a:**<sup>15</sup>  $^1\text{H}$  NMR (400 MHz) (syn isomer)  $\delta$  2.33 (brs, 1H), 3.65 (dd,  $J$  = 8.4, 7.6 Hz, 1H), 4.86 (dd,  $J$  = 17.2, 1.6 Hz, 1H), 4.91 (dd,  $J$  = 8.4, 2.0 Hz, 1H), 5.01 (dd,  $J$  = 10.4, 1.2 Hz, 1H), 5.91 (ddd,  $J$  = 17.2, 10.4, 8.0 Hz, 1H), 7.05–7.40 (m, 10H); (anti isomer)  $\delta$  1.96 (brs, 1H), 3.56 (t,  $J$  = 8.4 Hz, 1H), 4.86 (dd,  $J$  = 8.4, 2.0 Hz, 1H), 5.24 (dd,  $J$  = 16.4, 1.2 Hz, 1H), 5.28 (dd,  $J$  = 10.4, 1.2 Hz, 1H), 6.26 (ddd,  $J$  = 17.2, 10.4, 9.2 Hz, 1H), 7.05–7.40 (m, 10H).

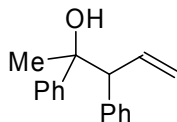

**11i:**<sup>16</sup>  $^1\text{H}$  NMR (400 MHz) (syn isomer)  $\delta$  1.58 (s, 3H), 2.07 (brs, 1H), 3.59 (d,  $J$  = 10.4 Hz, 1H), 5.09 (ddd,  $J$  = 16.8, 1.6, 0.8 Hz, 1H), 5.17 (dd,  $J$  = 10.4, 2.0 Hz, 1H), 6.24 (dt, 17.2, 10.4 Hz, 1H), 7.10–7.32 (m, 10H); (anti isomer)  $\delta$  1.43 (s, 3H), 2.00 (brs, 1H), 3.62 (d,  $J$  = 8.8 Hz, 1H), 4.92 (ddd,  $J$  = 16.8, 1.6, 0.8 Hz, 1H), 5.04 (ddd,  $J$  = 10.8, 2.0, 0.8 Hz, 1H), 6.10 (ddd, 16.8, 10.8, 8.8 Hz, 1H), 6.90–6.94 (m, 1H), 7.10–7.32 (m, 9H).

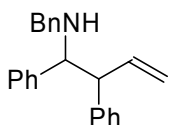

**11e:**  $^1\text{H}$  NMR (400 MHz)  $\delta$  1.73 (brs, 1H), 3.35 (d,  $J$  = 13.6 Hz, 1H), 3.55 (dd,  $J$  = 8.4, 8.0 Hz, 1H), 3.61 (d,  $J$  = 14.0 Hz, 1H), 3.84 (d,  $J$  = 9.2 Hz, 1H), 4.67 (d,  $J$  = 17.2 Hz, 1H), 4.82 (d,  $J$  = 10.0 Hz, 1H), 5.76 (ddd,  $J$  = 17.2, 10.4, 8.0 Hz, 1H), 7.01 (dm,  $J$  = 8.0 Hz, 2H), 7.18 (dm,  $J$  = 8.4 Hz, 2H), 7.21–7.37 (m, 11H);  $^{13}\text{C}$  NMR (75 MHz)  $\delta$  51.0, 57.6, 65.9, 116.1, 126.5, 126.7, 127.1, 127.9, 127.97, 128.02, 128.3, 128.52, 128.54, 138.9, 140.1, 141.2, 141.6. IR (KBr) 3340, 3026, 1599, 1453, 698  $\text{cm}^{-1}$ . HRMS (FAB)  $m/z$  calcd for  $\text{C}_{23}\text{H}_{25}\text{N}$  ( $\text{MH}^+$ ): 314.1909, found 314.1909.

**Synthesis of copper complex 4.** To a suspension of CuI (95.4 mg, 0.50 mmol) in dry THF (1.2 mL) were added **1** (97.7 mg, 0.55 mmol) and dry THF (0.8 mL). After the mixture was stirred at room temperature for 16 h, the mixture was filtrated and washed with THF to afford **4** (128.8 mg, 73%).  $^1\text{H}$  NMR (400 MHz,  $\text{CD}_3\text{CN}$ )  $\delta$  0.35 (s, 12H), 1.81 (d,  $J$  = 8.0 Hz, 4H), 4.68 (d,  $J$  = 16.4 Hz, 2H), 4.71 (d,  $J$  = 9.2 Hz, 2H), 5.57 (ddd,  $J$  = 17.2, 9.2, 8.0 Hz, 2H), 7.35 (t,  $J$  = 5.6 Hz, 2H), 7.63 (d,  $J$  = 7.6 Hz, 2H), 7.74 (t,  $J$  = 5.6

Hz, 2H), 8.82 (d,  $J = 4.8$  Hz, 2H);  $^{13}\text{C}$  NMR (100 MHz,  $\text{CD}_3\text{CN}$ )  $\delta$  -3.0, 22.2, 103.5 (br), 124.5, 124.7 (br), 130.7, 135.8, 151.5, 167.0. LRMS (FAB)  $m/z$  607 (bridged dimer – I), 430 (bridged dimer – I – allylsilane), 240 (monomer – I); HRMS (FAB)  $m/z$  calcd for  $\text{C}_{20}\text{H}_{30}\text{N}_2\text{Si}_2\text{Cu}_2\text{I}$  ( $[\text{M} - \text{I}]^+$ ): 606.9584, found 606.9580.

**Reaction of 4 with benzaldehyde.** To a suspension of **4** (55.4 mg, 0.16 mmol) and benzaldehyde **2a** (13.9 mg, 0.13 mmol) in dry THF (0.3 mL) were added CsF (35.7 mg, 0.24 mmol) and dry THF (0.2 mL). After the mixture was stirred at room temperature for 2 h, sat.  $\text{NH}_4\text{Cl}$  aq (2 mL) was added to the reaction mixture. The aqueous layer was extracted with  $\text{Et}_2\text{O}$  (2 mL  $\times$  3), and the combined organic phase was dried over  $\text{MgSO}_4$ . Removal of solvents and subsequent silica gel chromatography (hexane/ $\text{EtOAc}$  = 5/1) afforded **3a** (14.1 mg, 73%).

#### Transformation of homoallylic amine **11e** to 4-acetoxypiperidine **15** (Scheme 3).

To a solution of homoallylic amine **11e** (327.3 mg, 1.00 mmol) and  $\text{Na}_2\text{WO}_4 \cdot 2\text{H}_2\text{O}$  (33.0 mg, 0.1 mmol) in acetone (1 mL) was added 30%  $\text{H}_2\text{O}_2$  aq (8.3 mmol, 1 mL). After the mixture was stirred at room temperature for 3 days, the mixture was poured into  $\text{H}_2\text{O}$  (10 mL) and then filtrated. The residue was washed with hexane to afford nitron **12** as colorless solid (257.9 mg, 76%).  $^1\text{H}$  NMR (400 MHz,  $\text{CDCl}_3$ )  $\delta$  4.70 (dd,  $J = 11.2, 7.6$  Hz, 1H),  $\delta$  4.94 (dt,  $J = 17.2, 1.6$  Hz, 1H), 4.99 (dt,  $J = 10.4, 1.2$  Hz, 1H), 5.05 (d,  $J = 11.2$  Hz, 1H), 5.82 (d,  $J = 17.2, 10.4, 7.6$  Hz, 1H), 5.82 (ddd,  $J = 17.2, 10.4, 7.6$  Hz, 1H), 7.13–7.18 (m, 2H), 7.23–7.29 (m, 6H), 7.35–7.43 (m, 6H), 7.70 (dm,  $J = 7.6$  Hz, 2H), 7.93–7.97 (m, 2H);  $^{13}\text{C}$  NMR (100 MHz,  $\text{CDCl}_3$ )  $\delta$  51.5, 84.3, 118.1, 126.9, 127.8, 128.0, 128.2, 128.3, 128.4, 128.8, 128.9, 129.8, 130.1, 133.5, 135.6, 136.6, 140.3; IR (KBr) 1576, 1455, 1146  $\text{cm}^{-1}$ . HRMS (FAB)  $m/z$  calcd for  $\text{C}_{23}\text{H}_{22}\text{NO}$  ( $\text{MH}^+$ ): 328.1701, found 328.1703.

This nitron **12** was dissolved to toluene (1 mL) and the resultant solution was heated at 110  $^\circ\text{C}$  (reflux) for 12 h. Removal of solvent afforded **13** which was used for the next reaction without further purification.

A suspension of Zn powder (320.0 mg, 5.0 mmol) and **13** in acetic acid (5 mL) was stirred at 60  $^\circ\text{C}$  for 15 h. After filtration of the resultant mixture, filtrate was poured into 10%  $\text{NH}_3$  aq (25 mL). The resultant mixture was extracted with  $\text{CHCl}_3$  (20 mL  $\times$  3), and the combined organic layer was washed with 5%  $\text{NH}_3$  aq (20 mL  $\times$  2) and dried over  $\text{MgSO}_4$ . Removal of the solvents afforded **14** which was used for the next reaction without further purification.

To a solution of **14** in  $\text{CH}_2\text{Cl}_2$  were added triethylamine (0.5 mL, 3.5 mmol), acetic anhydride (0.6 mL, 2.5 mmol) and 4-dimethylaminopyridine (5 mg, 0.05 mmol). After the mixture was stirred at room temperature for 12 h,  $\text{H}_2\text{O}$  (5 mL) was added to the mixture. The mixture was extracted with  $\text{CH}_2\text{Cl}_2$  (5 mL  $\times$  3), and combined organic layer was washed with brine (5 mL  $\times$  1) and dried with  $\text{MgSO}_4$ . Removal

of solvents under reduced pressure and subsequent silica gel chromatography (hexane/EtOAc/Et<sub>3</sub>N = 100/20/1) afforded **15** (158.9 mg, 49%) as a mixture of diastereomers (77/23). (Major isomer could be purified by gel permeation chromatography, but minor isomer could not be separated from major isomer)

<sup>1</sup>H NMR (400 MHz, CDCl<sub>3</sub>) (major isomer) δ 1.87 (s, 3H), 1.97 (dt, *J* = 12.8, 4.0 Hz, 1H), 2.00 (brs, 1H), 2.21 (ddd, *J* = 12.0, 12.0, 12.0 Hz, 1H), 3.62 (dd, *J* = 5.2, 3.2 Hz, 1H), 4.12 (dd, *J* = 12.0, 3.2 Hz, 1H), 4.48 (d, *J* = 3.6 Hz, 1H), 5.40 (ddd, *J* = 12.4, 5.6, 5.6 Hz, 1H), 7.02–7.21 (m, 7H), 7.28 (dm, *J* = 7.2 Hz, 2H), 7.34 (tm, *J* = 7.2 Hz, 1H), 7.43 (t, *J* = 7.6 Hz, 1H), 7.60 (dm, *J* = 7.2 Hz, 2H), 7.65 (dm, *J* = 8.0 Hz, 2H); <sup>13</sup>C NMR (100 MHz, CDCl<sub>3</sub>) δ 21.2, 34.7, 49.7, 60.7, 63.3, 74.7, 126.2, 126.6, 126.70, 126.72, 127.1, 127.5, 127.7, 128.5, 131.4, 136.8, 141.5, 143.8, 170.4; IR (KBr) 3310, 3063, 1728, 1242 cm<sup>-1</sup>. HRMS (EI) *m/z* calcd for C<sub>25</sub>H<sub>25</sub>NO<sub>2</sub> (M<sup>+</sup>): 371.1885, found 371.1885.

(minor isomer) δ 1.90 (s, 3H), 2.49 (dt, *J* = 17.2, 3.6 Hz, 1H), 2.65 (ddd, *J* = 12.0, 12.0, 5.6 Hz, 1H), 3.53–3.56 (m, 1H), 4.47–4.49 (m, 1H), 4.80 (dm, *J* = 2.8 Hz, 1H), 5.38–5.46 (m, 1H), 7.06–7.68 (m, 15H); <sup>13</sup>C NMR (100 MHz, CDCl<sub>3</sub>) δ 21.3, 31.7, 50.4, 54.0, 57.1, 71.4, 126.20, 126.6, 126.8, 126.9, 127.2, 127.6, 127.7, 128.6, 131.1, 136.9, 141.6, 143.7, 170.3.

The NOE data of **15** (major isomer) are as follow.

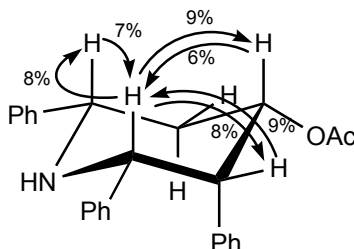



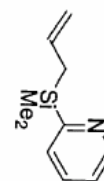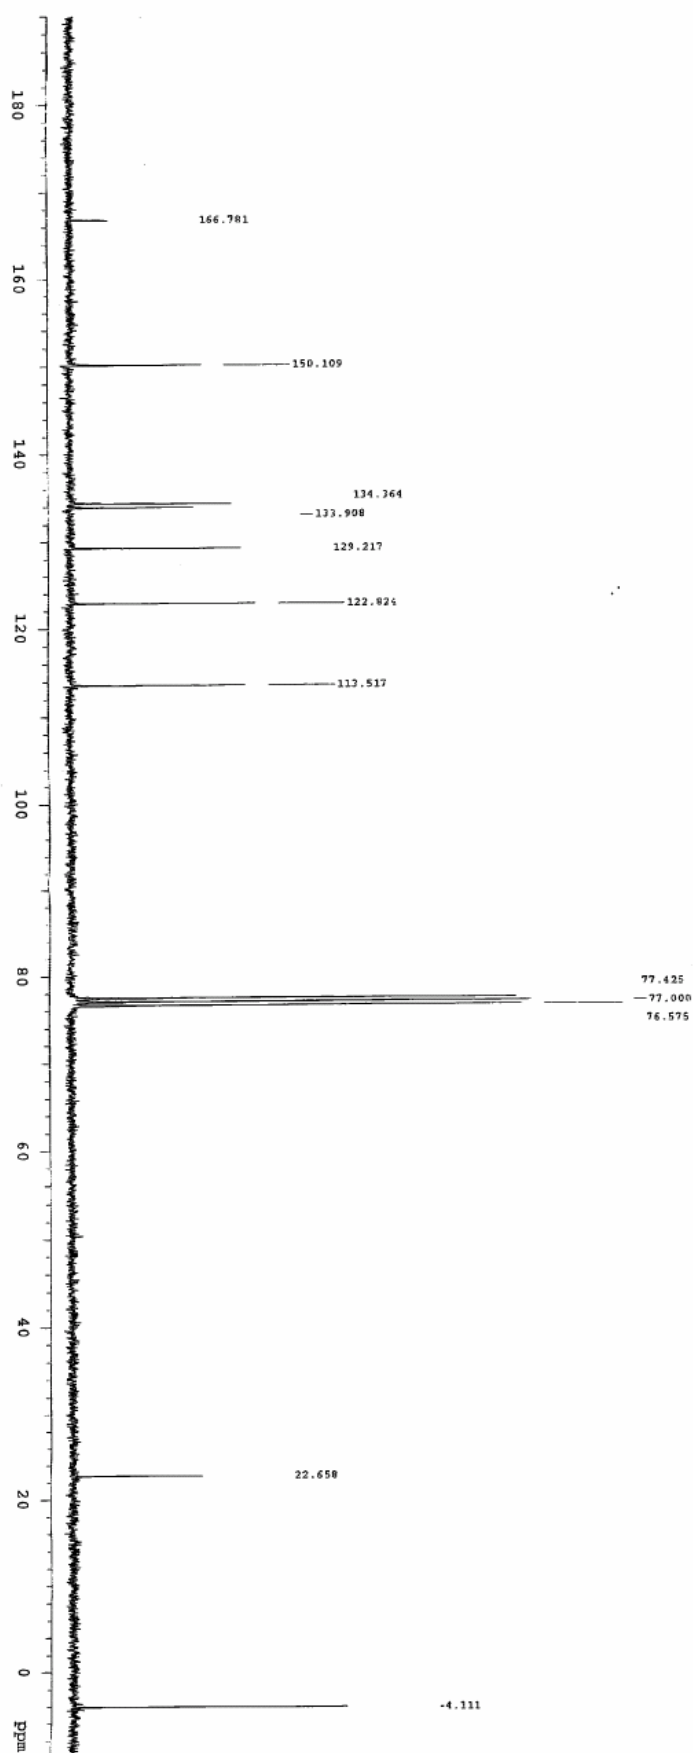

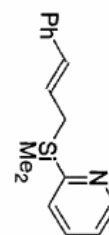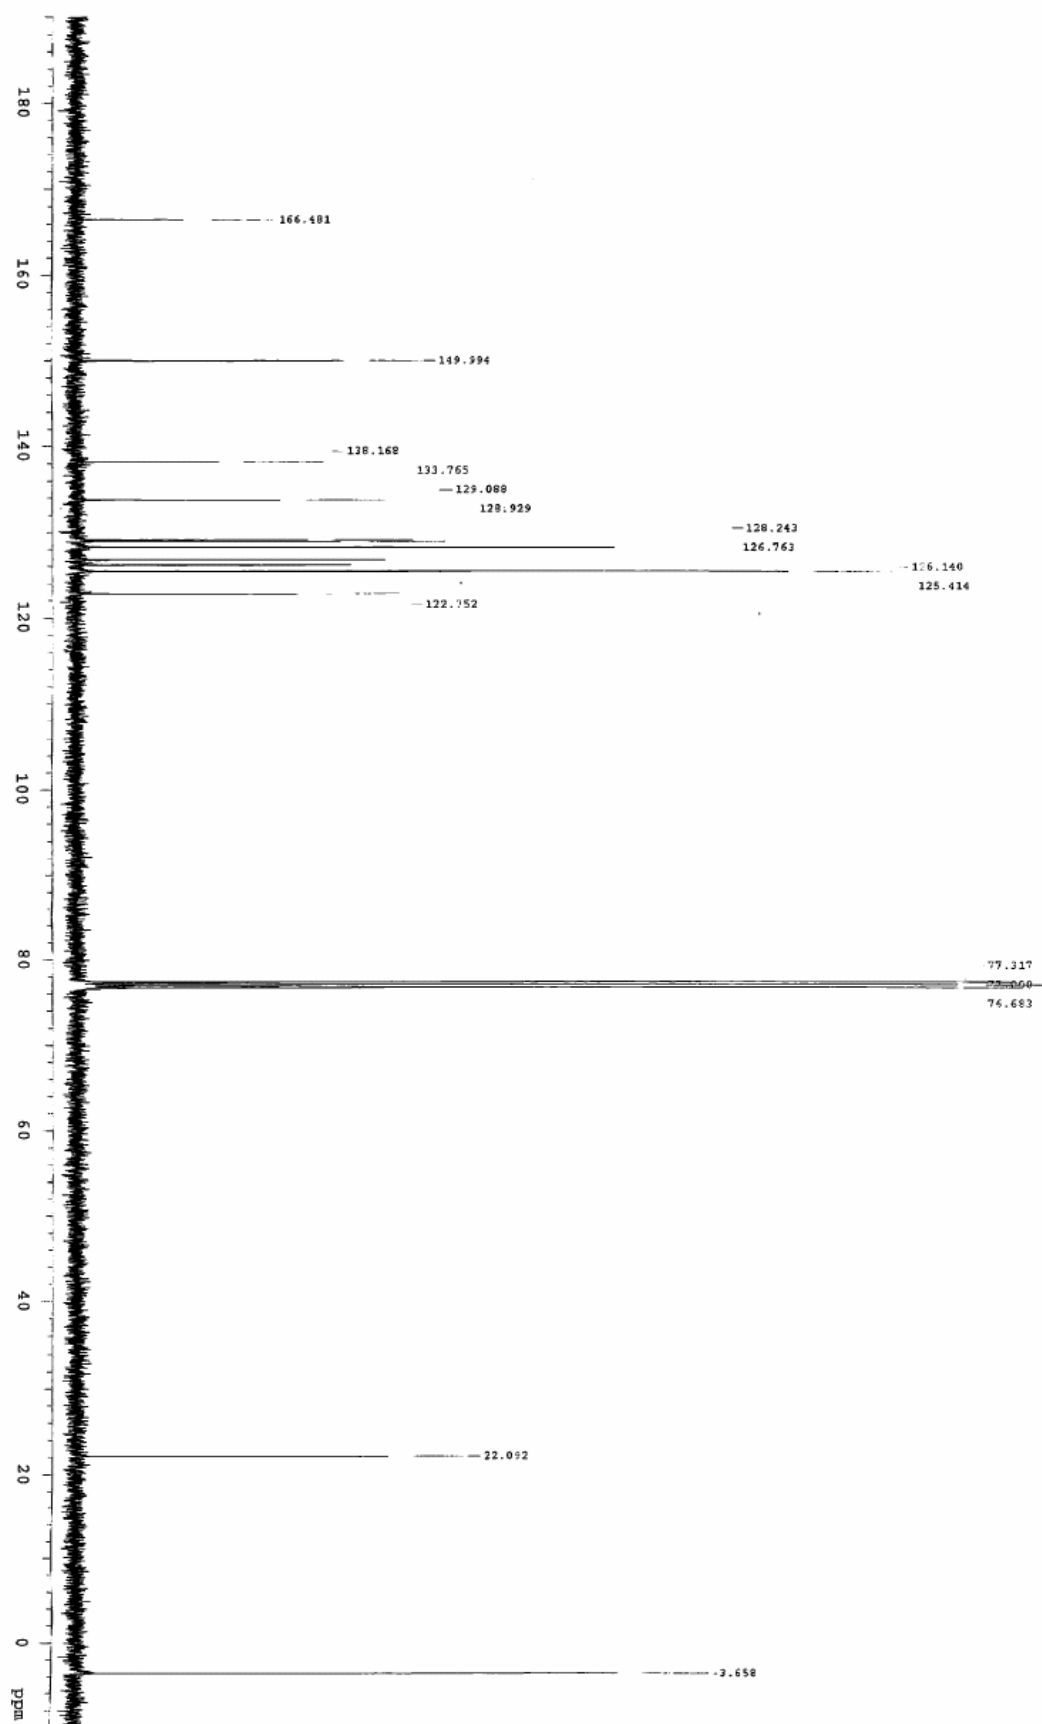

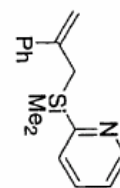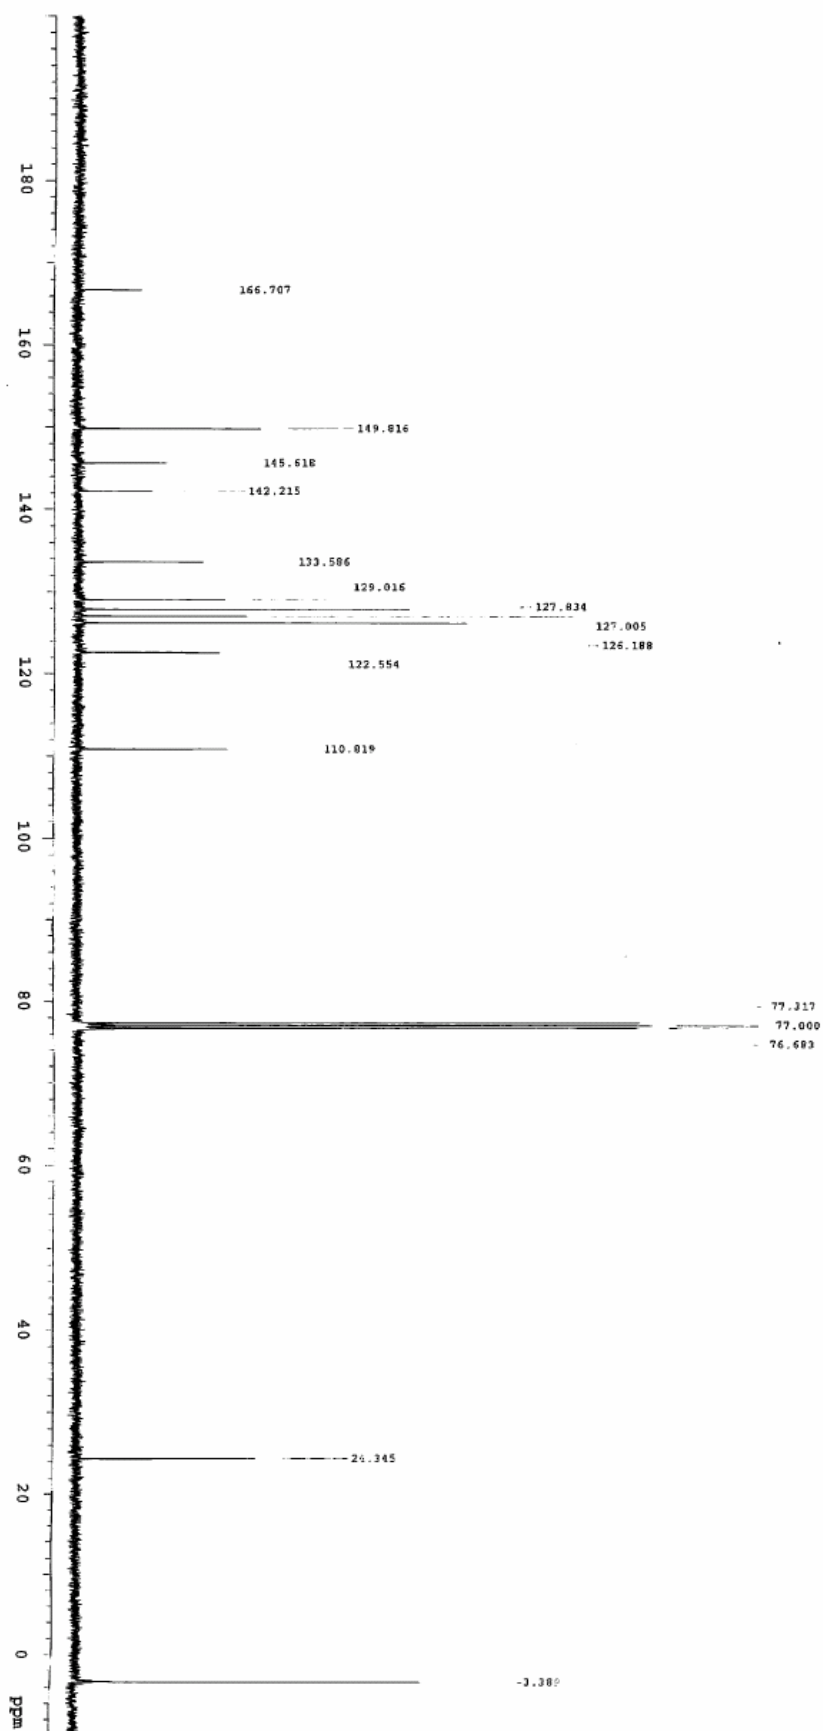

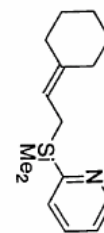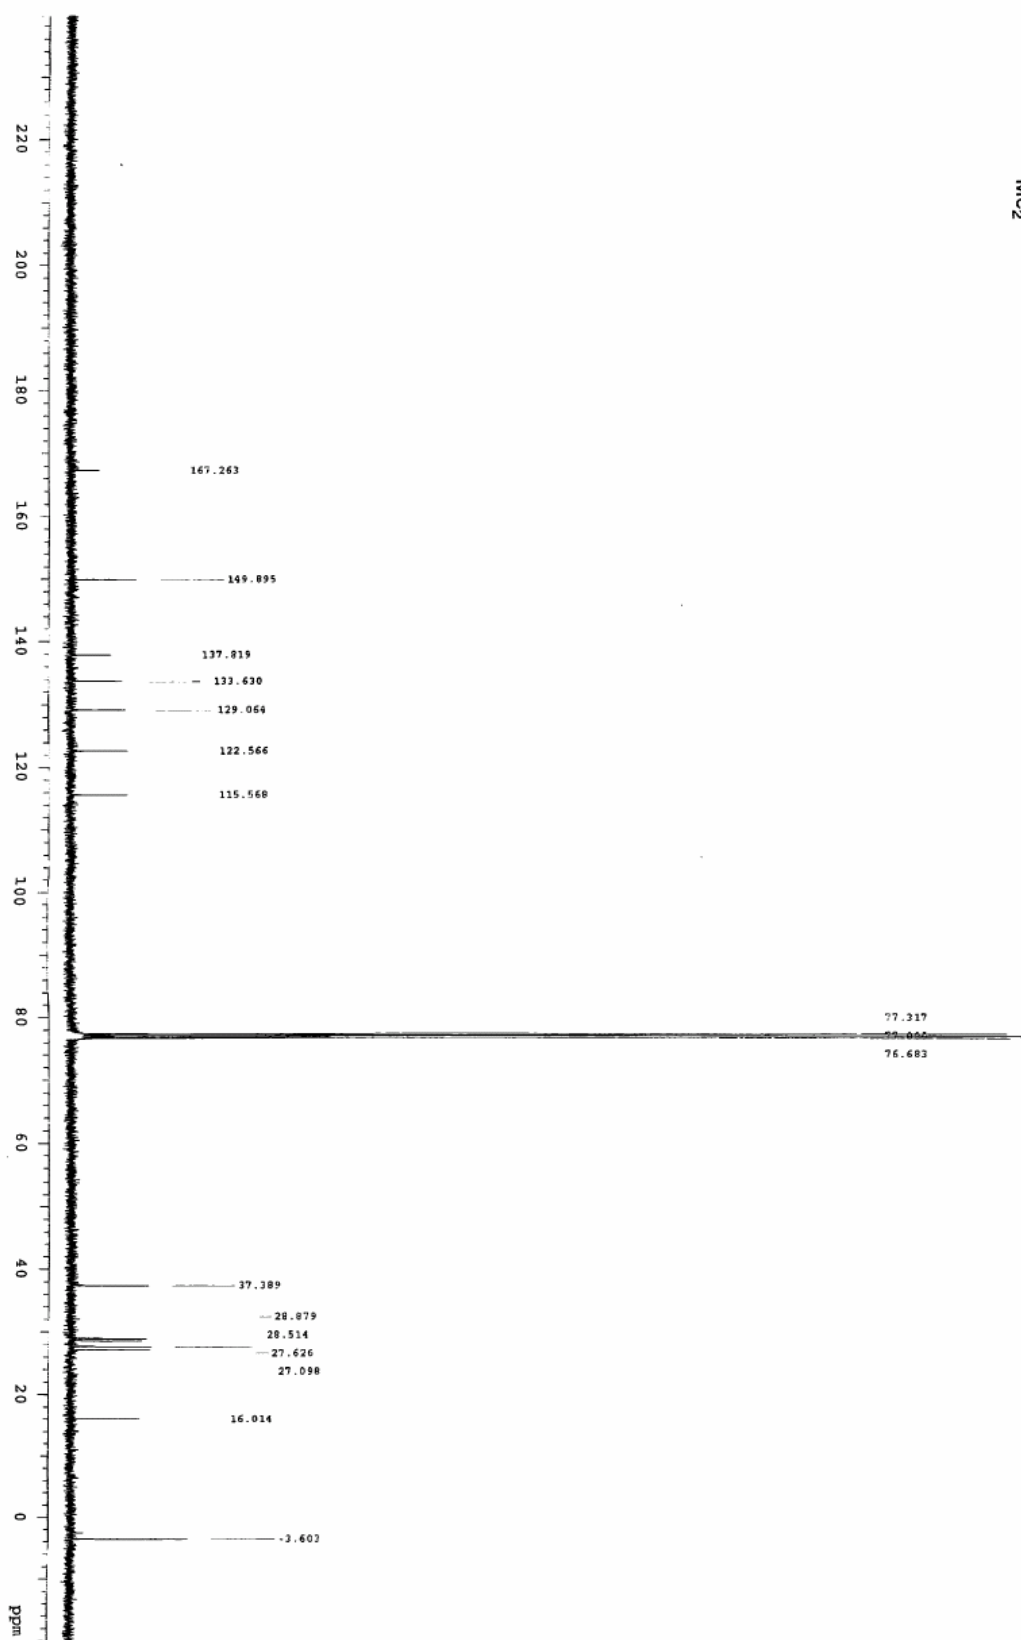

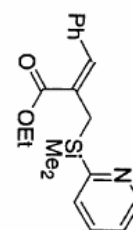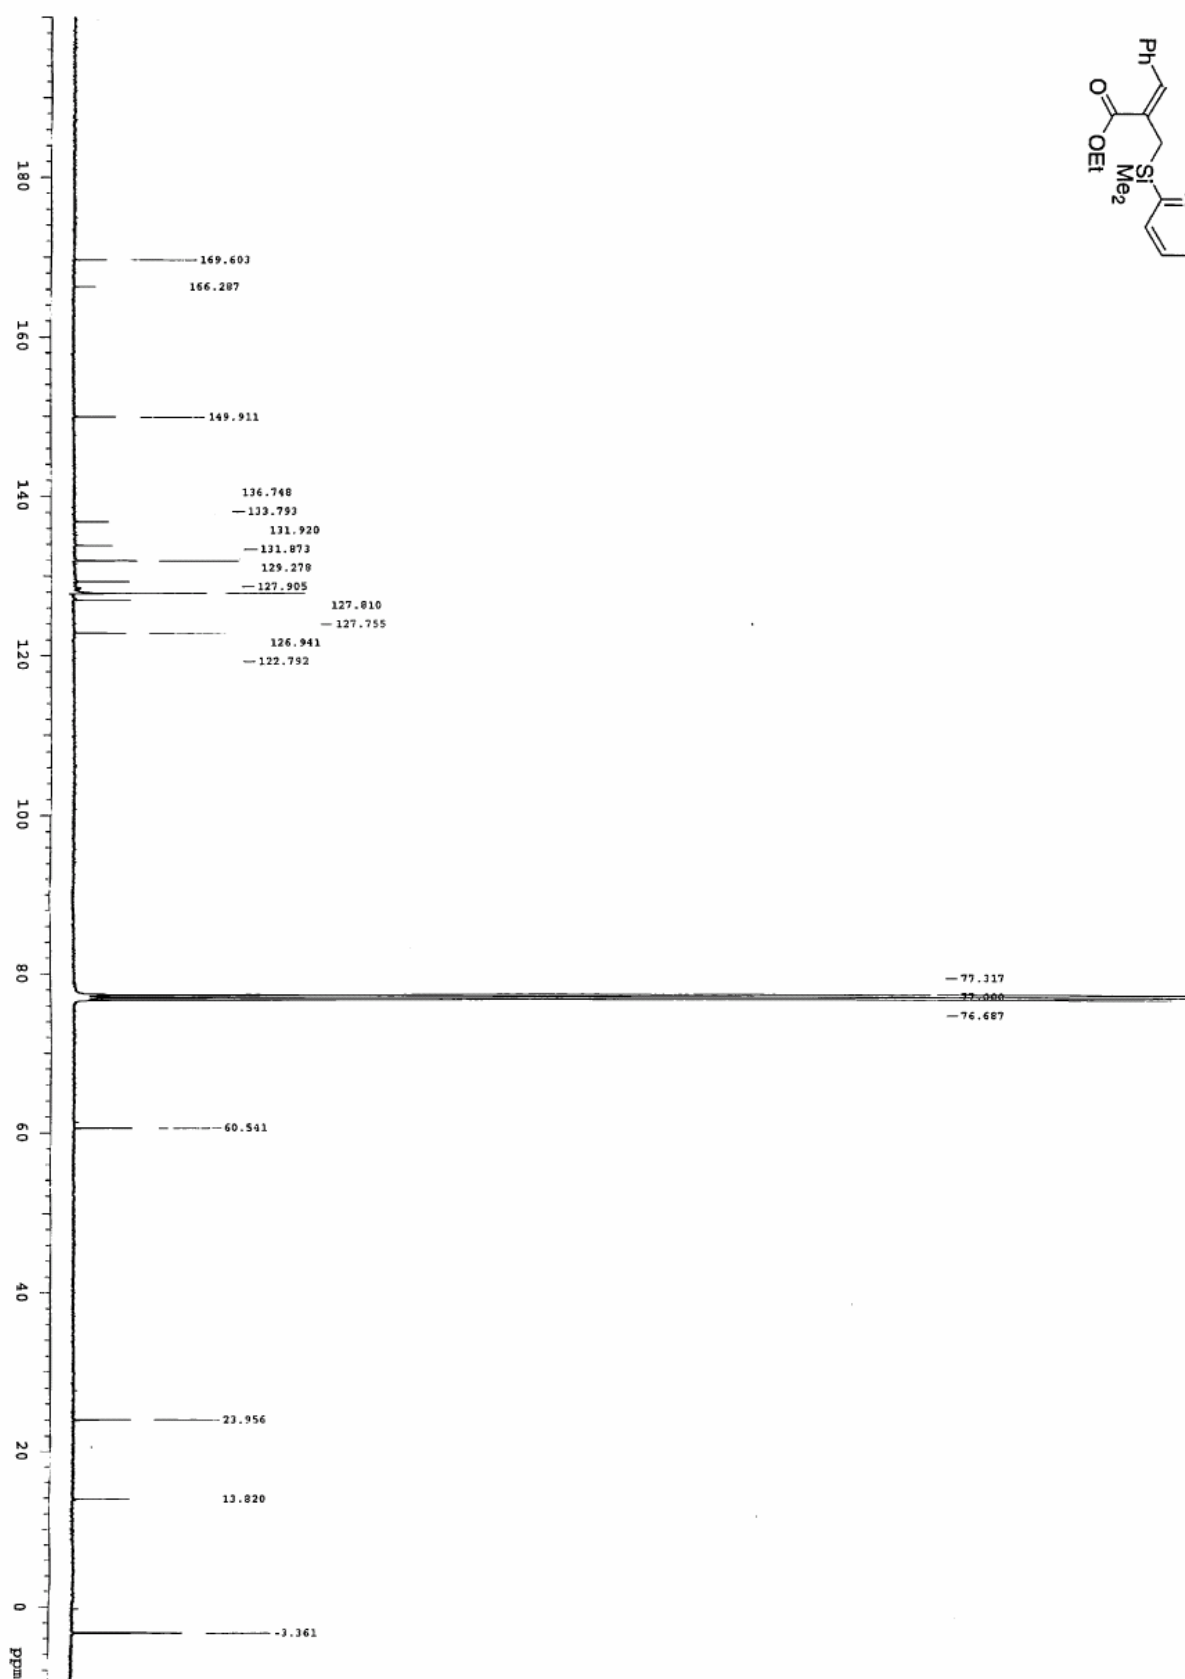

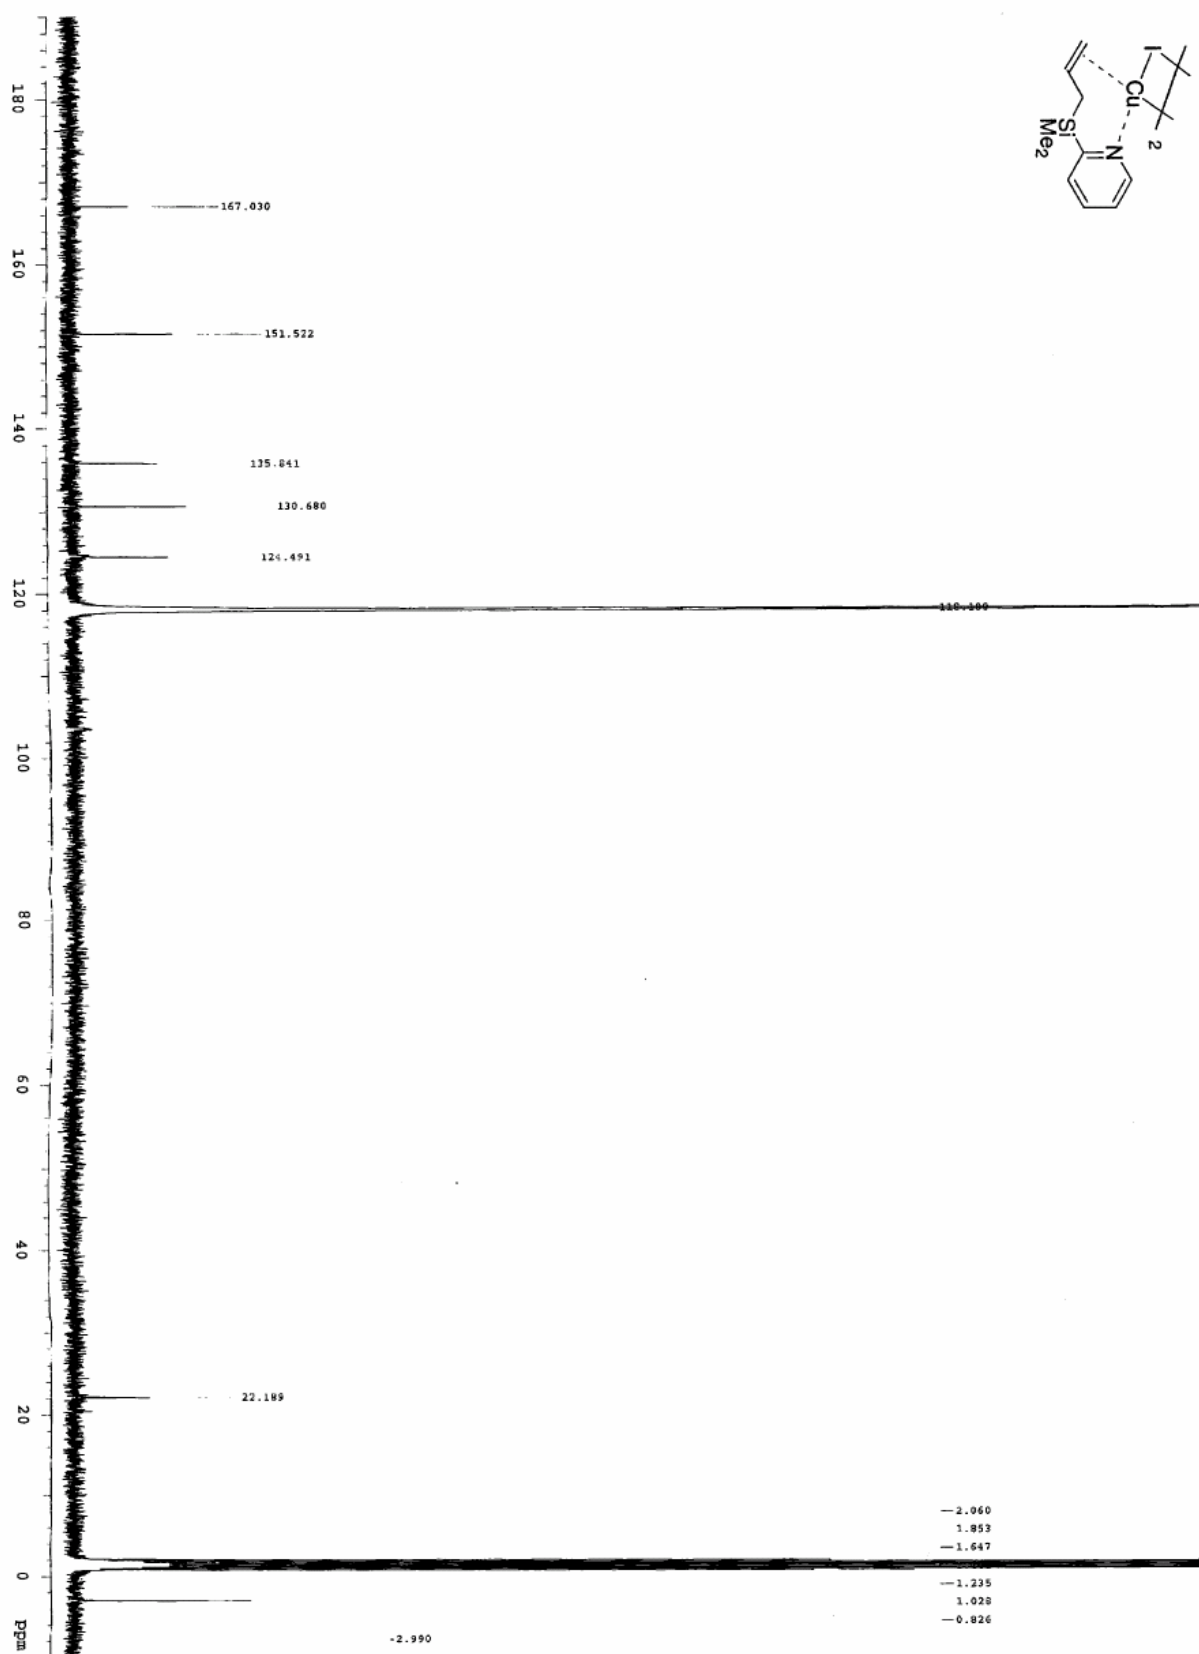

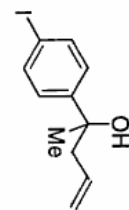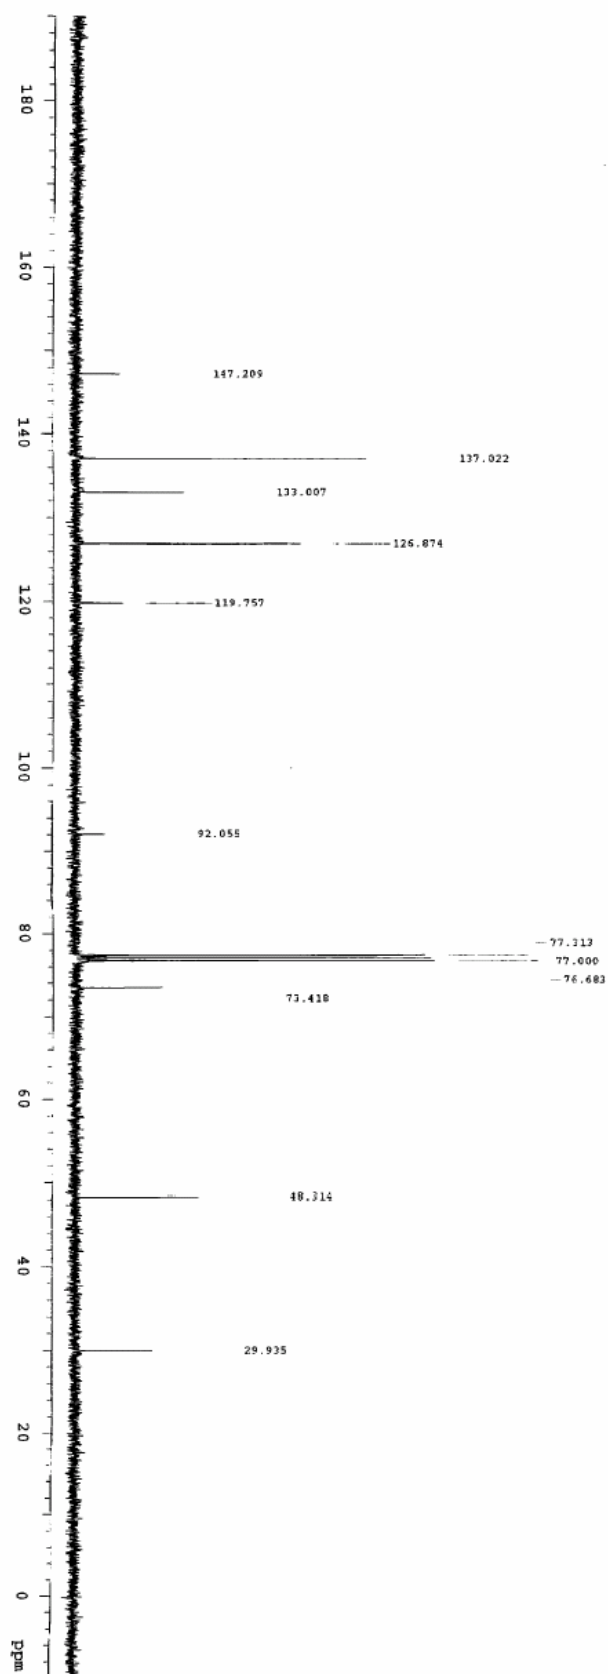

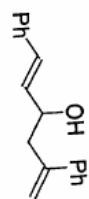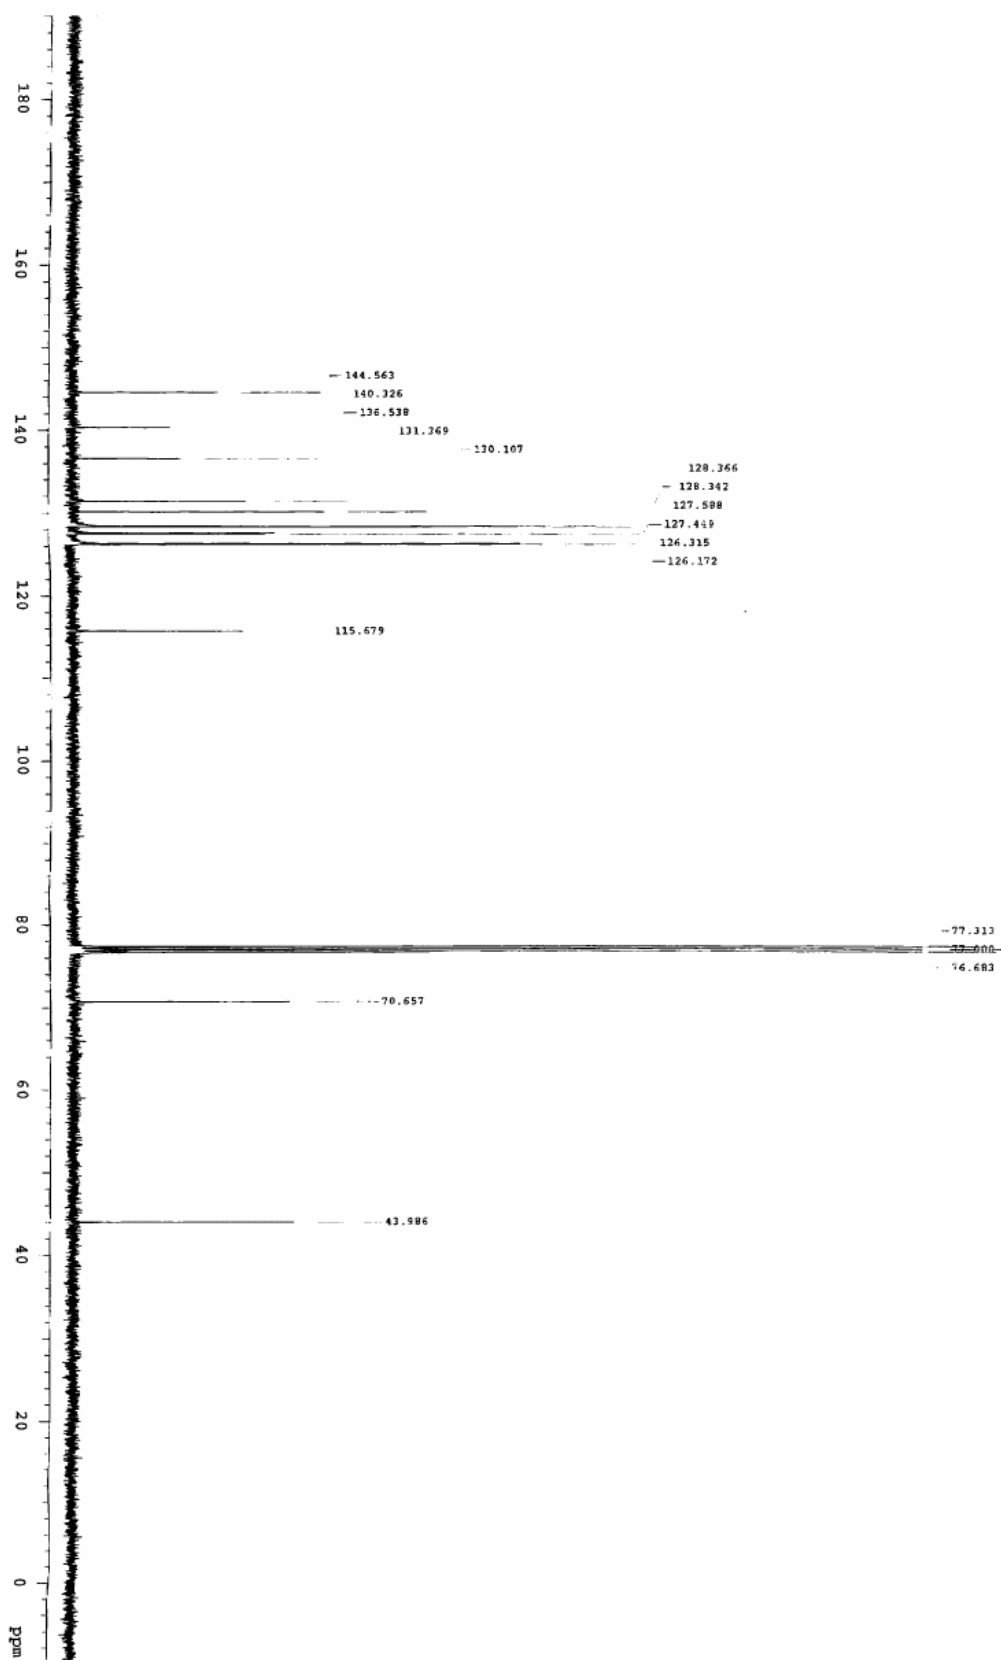



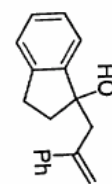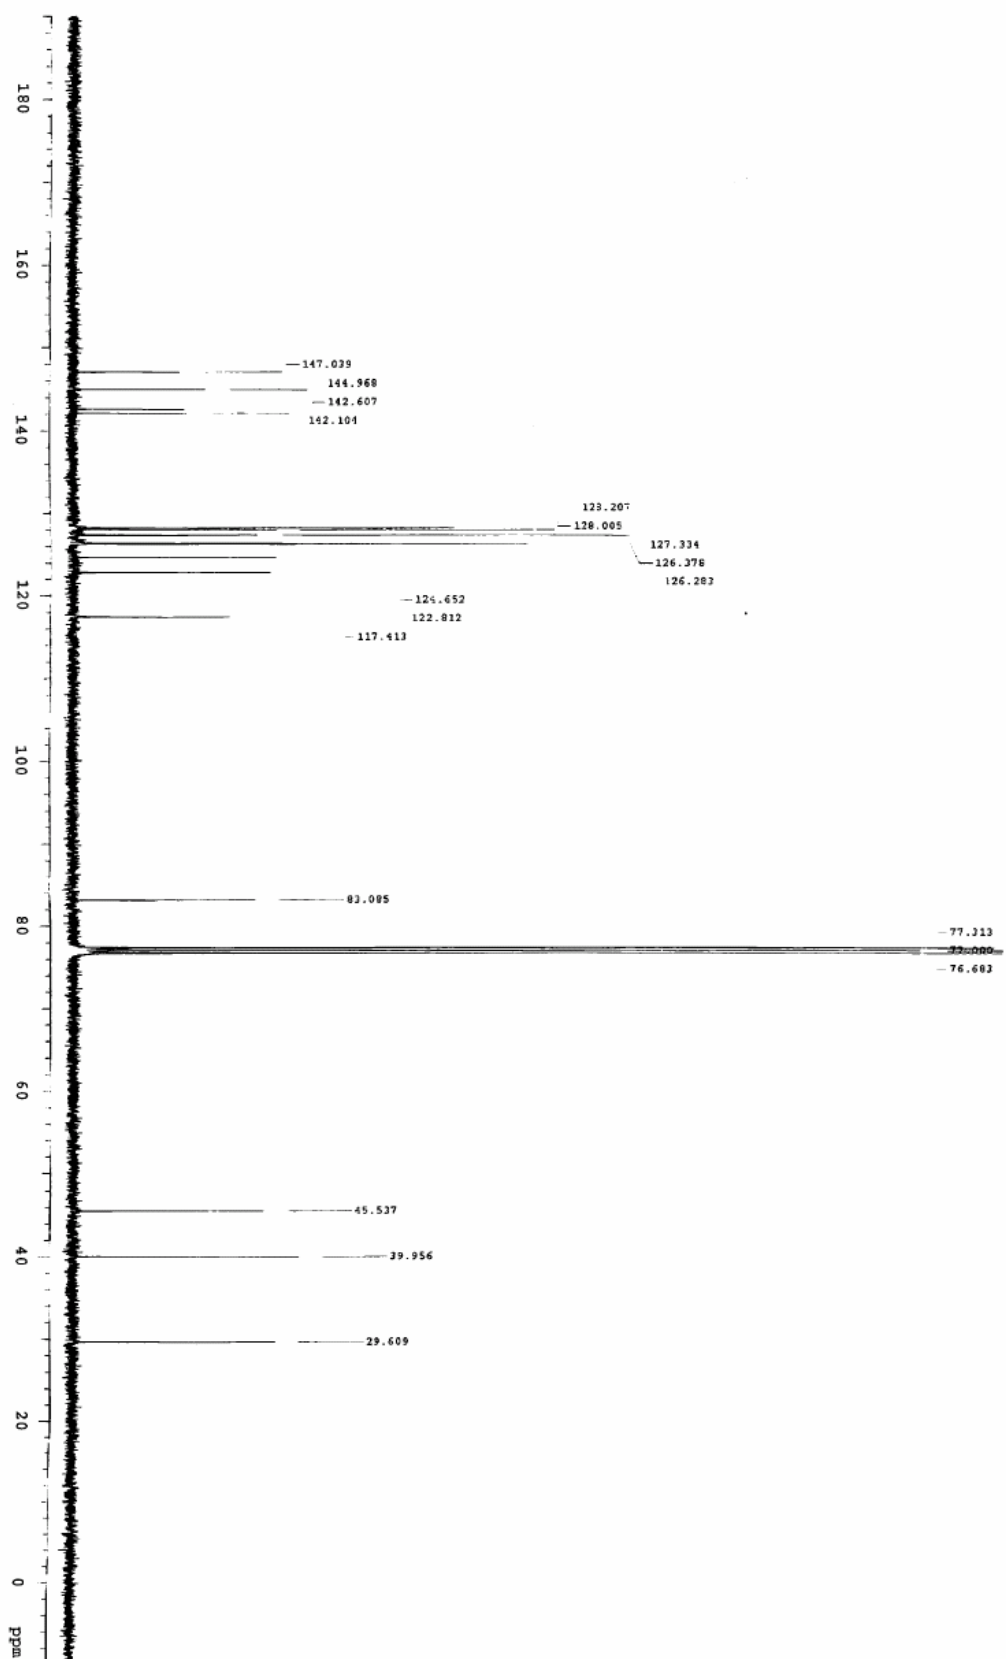

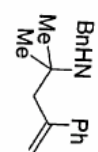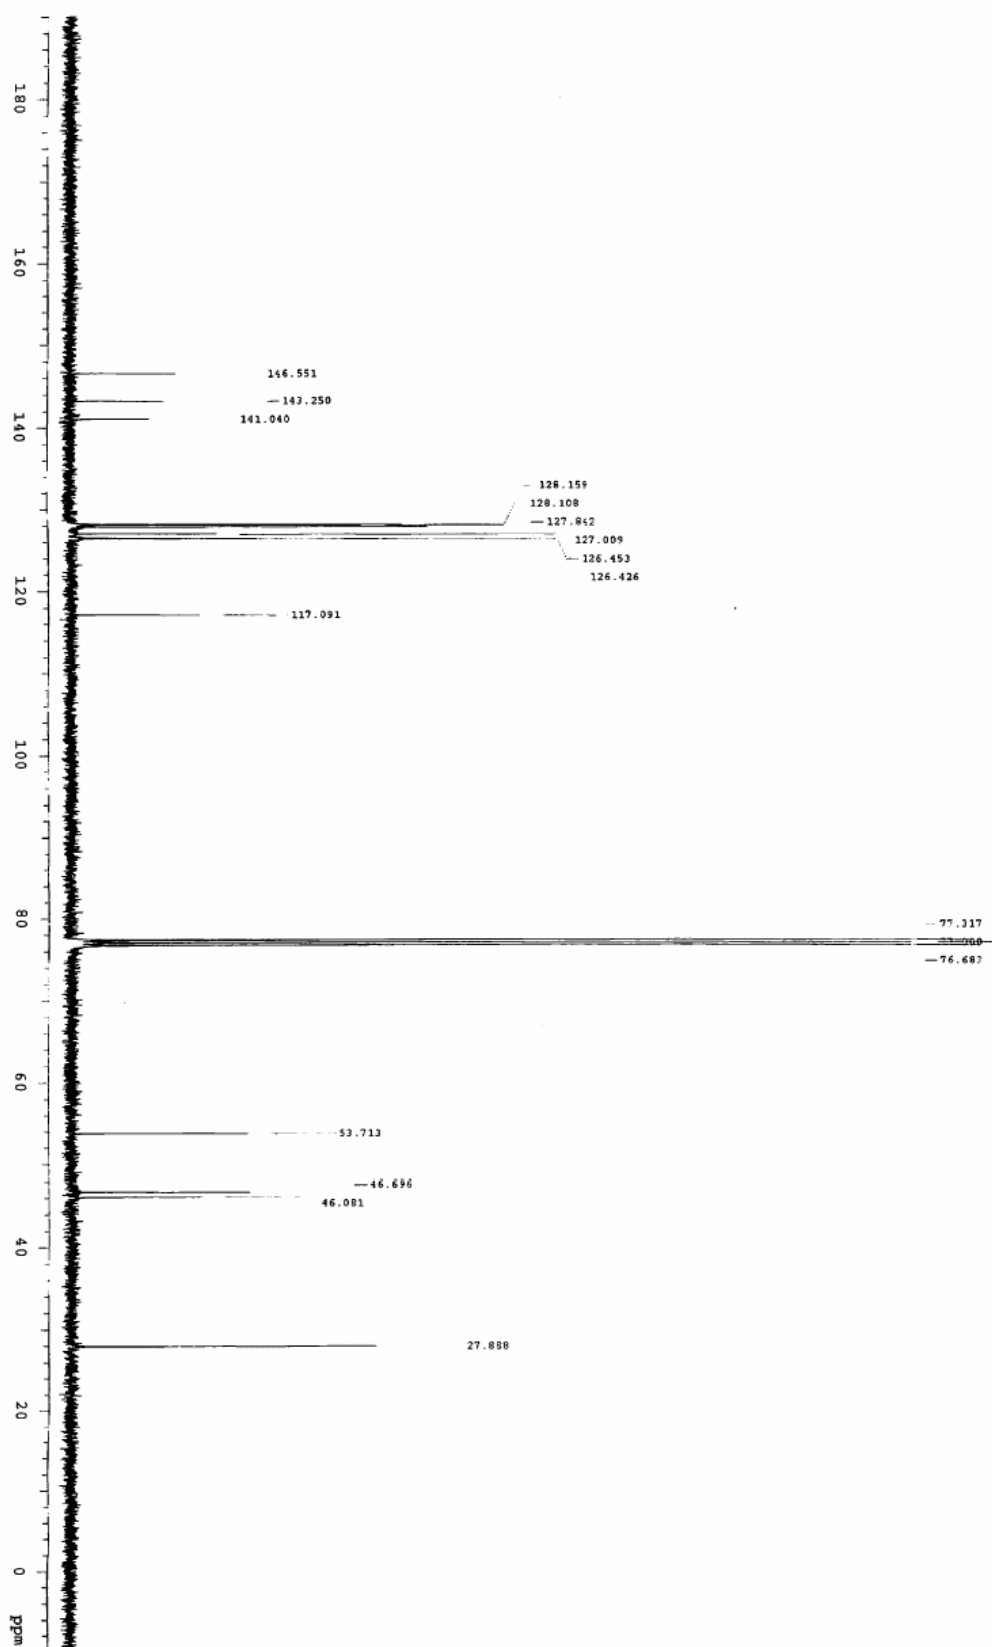

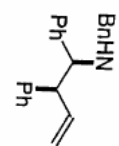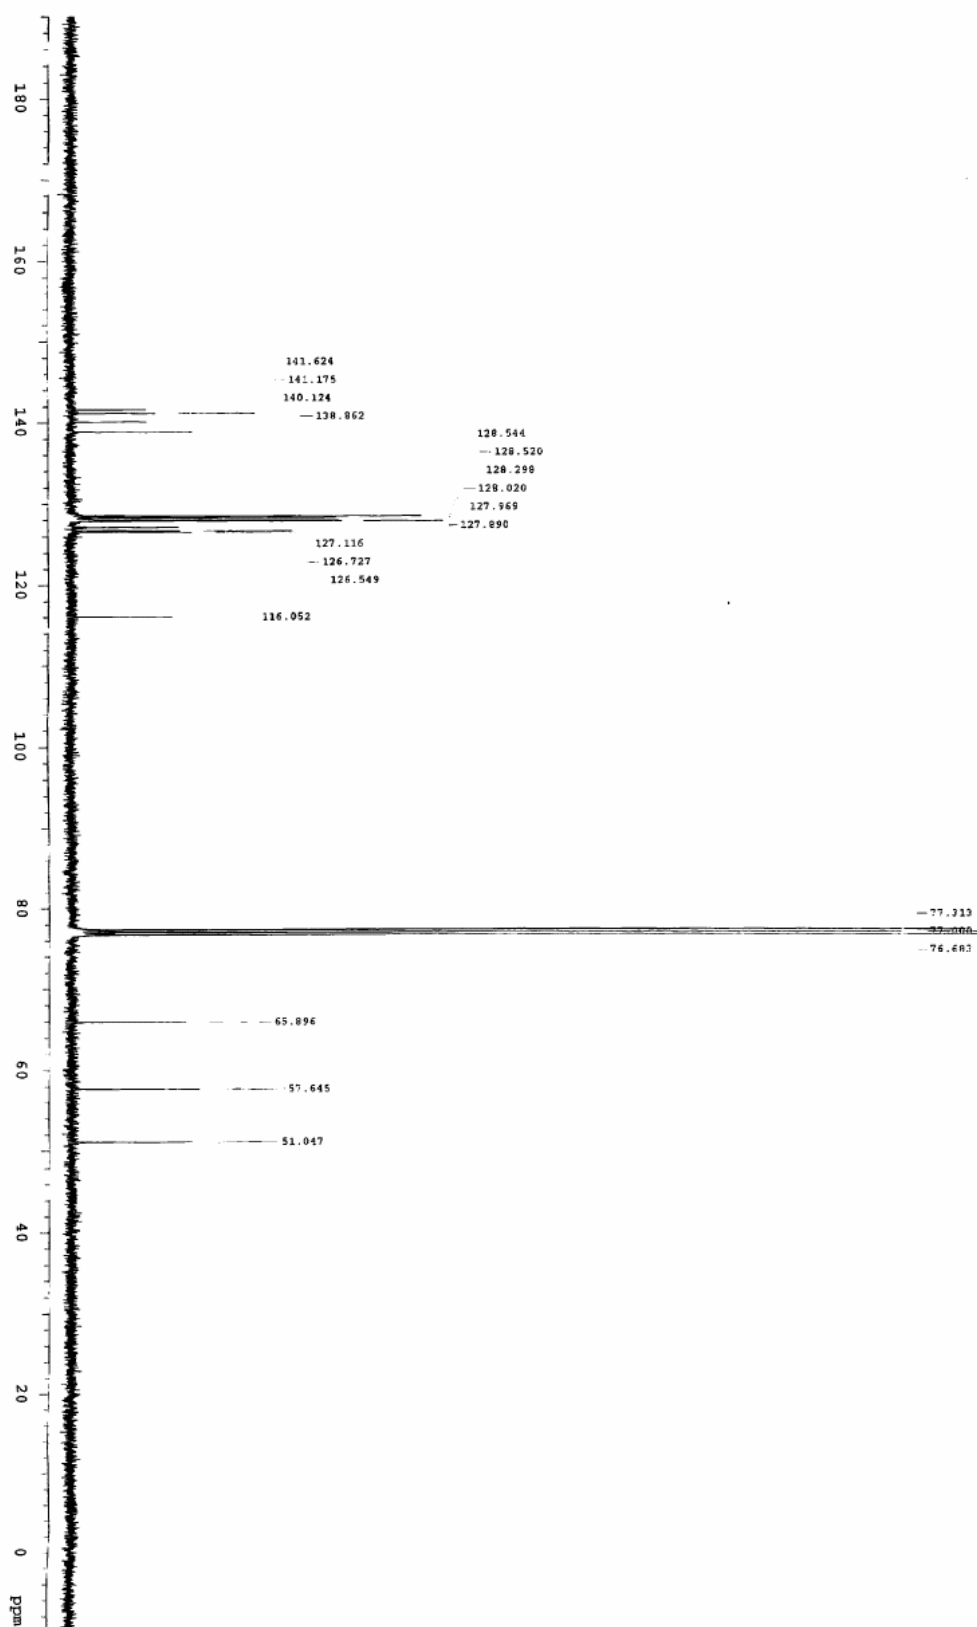

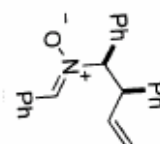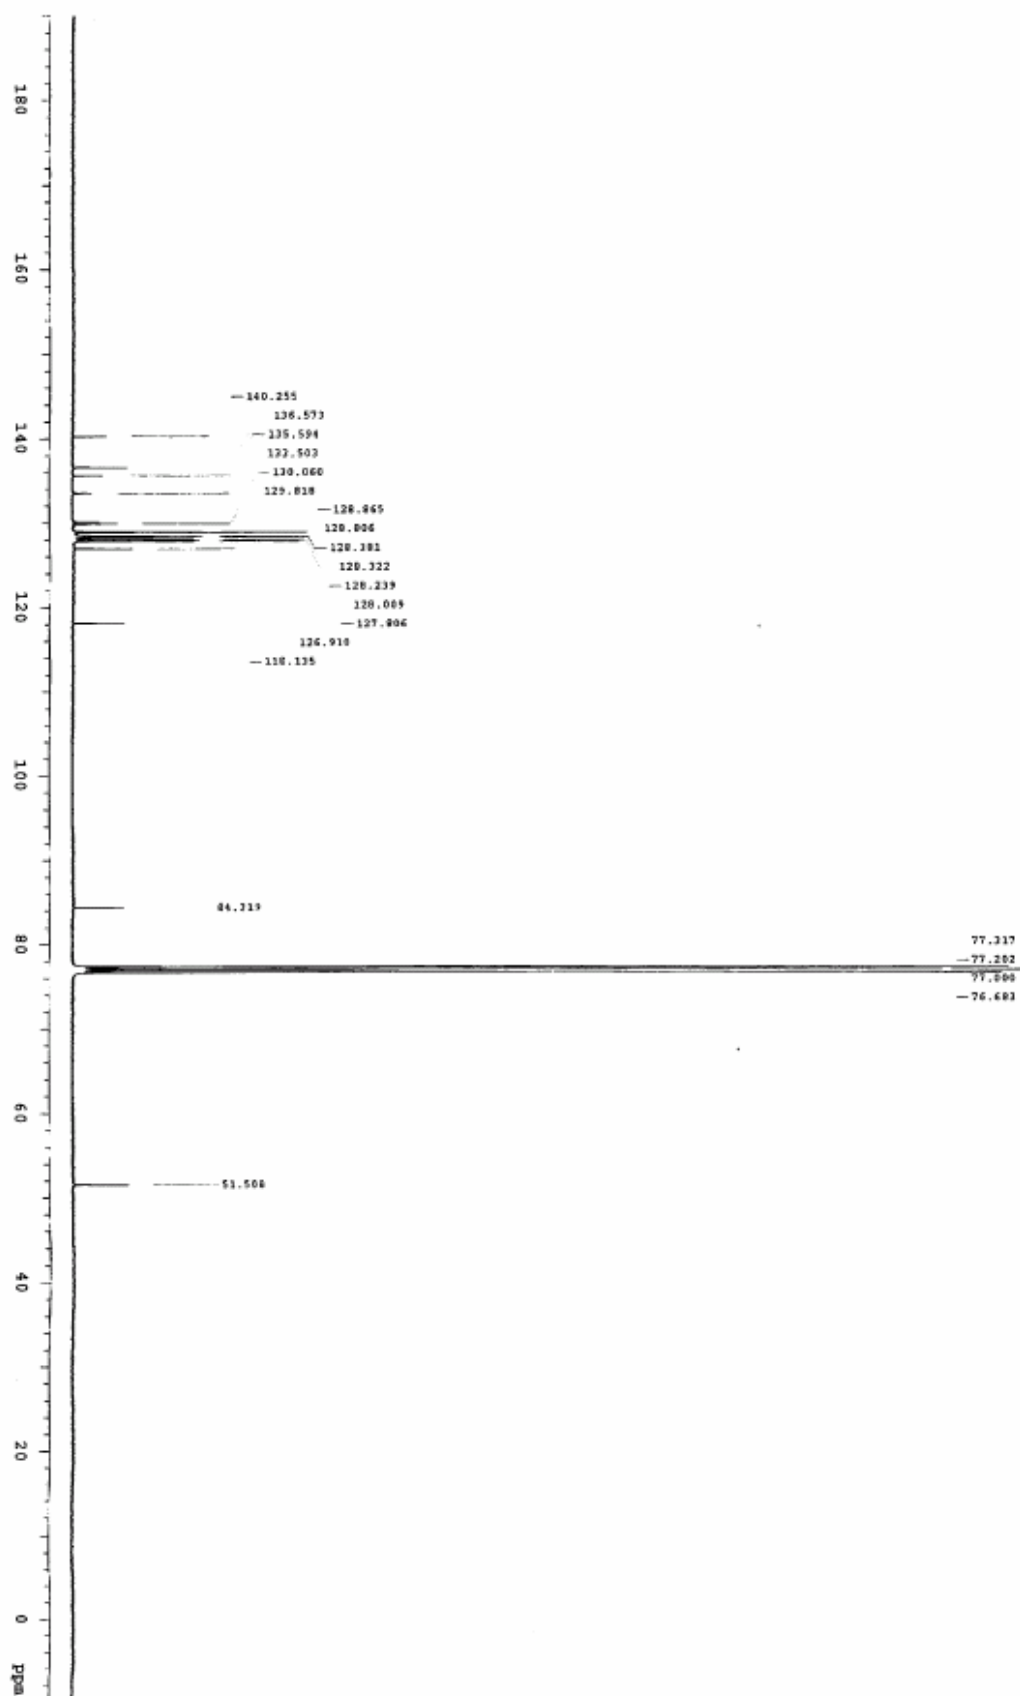

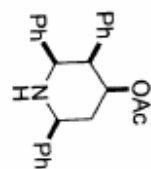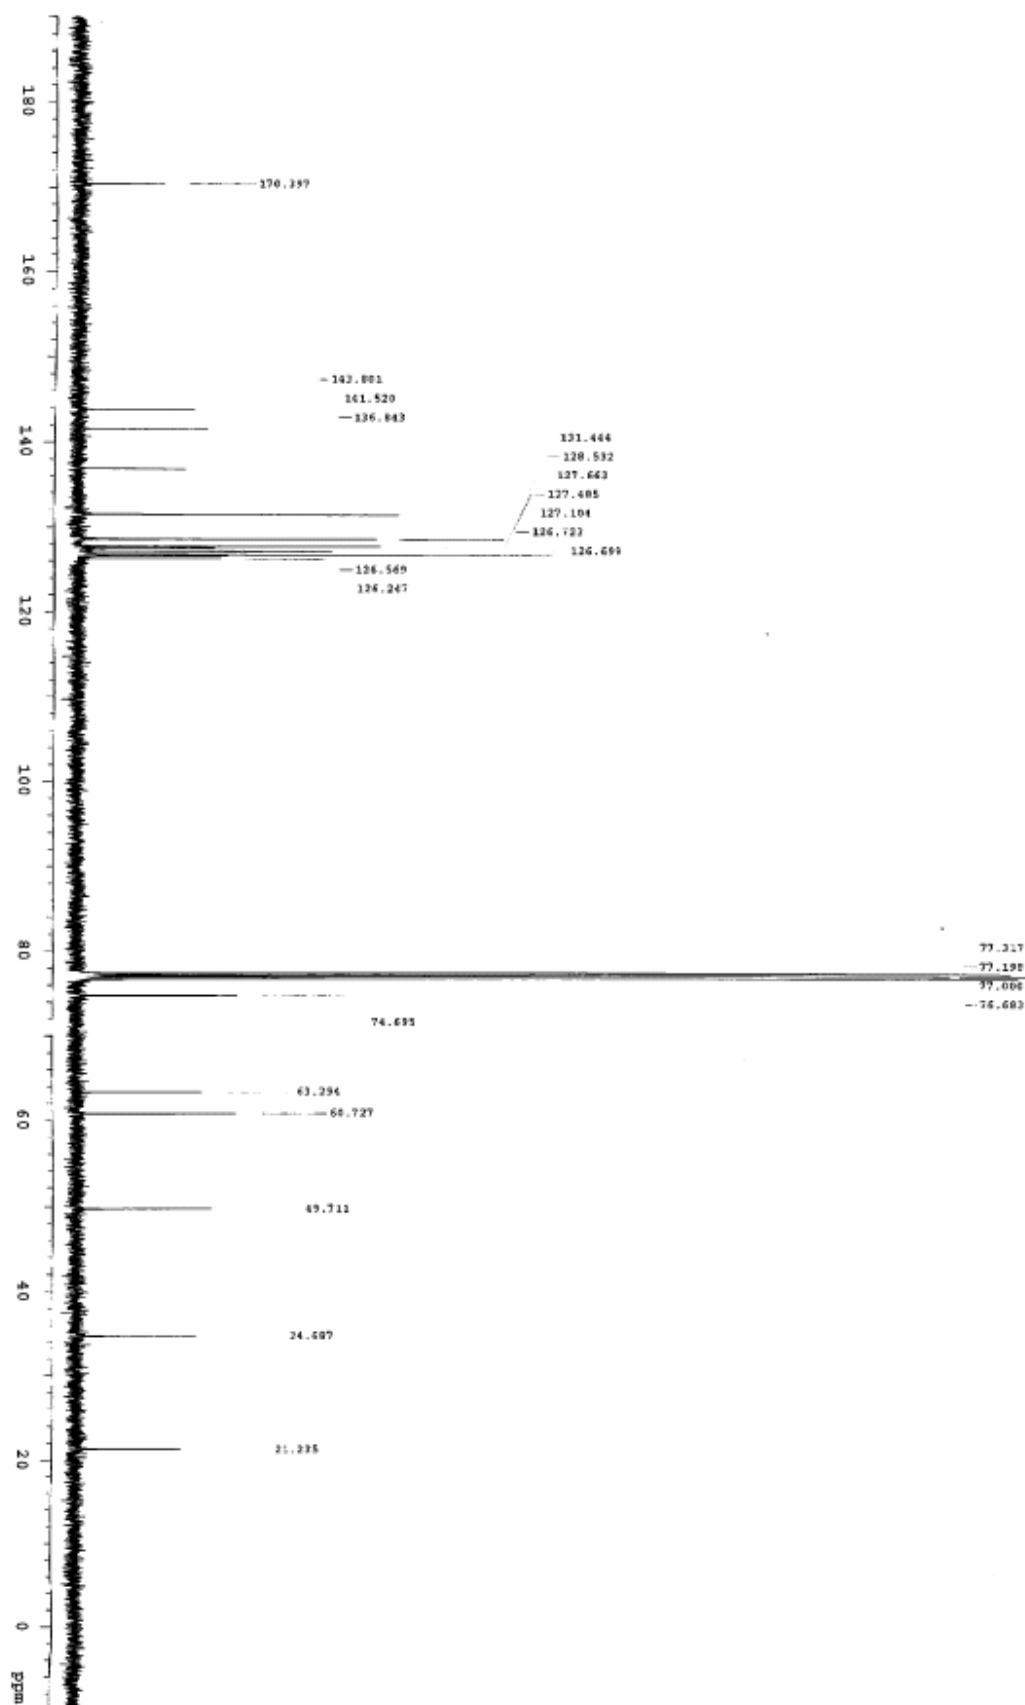

## References

---

1. Itami, K.; Kamei, T.; Yoshida, J. *J. Am. Chem. Soc.* **2001**, *123*, 8773.
2. Brown, H. C.; Hamaoka, T.; Ravindran, N.; Subrahmanyam, C.; Somayaji, V.; Bhat, N. G. *J. Org. Chem.* **1989**, *64*, 6705.
3. Kamiya, N.; Chikami, Y.; Ishii, Y. *Synlett* **1990**, 675.
4. Stille, J. K.; Simpson, J. K. *J. Am. Chem. Soc.* **1987**, *109*, 2138.
5. Stork, G.; Zhao, K. *Tetrahedron Lett.* **1989**, *17*, 2173.
6. Rossi, R.; Carpita, A.; Bellina, F.; Cossi, P. *J. Organomet. Chem.* **1993**, *451*, 33.
7. Boullet, F. T. *Synthesis* **1985**, 679.
8. Huang, Y-Z.; and Liao, Y. *J. Org. Chem.* **1991**, *56*, 995.
9. Jiang, S.; Agoston, G. E.; Chen, T.; Cabal, M-P.; Turos E. *Organometallics* **1995**, *14*, 4697.
10. Araki, S.; Ito, H.; Butsugan, Y. *J. Organomet. Chem.* **1988**, *347*, 5.
11. Shibata, I.; Nose, K.; Sakamoto, K.; Yasuda, M.; Baba, A. *J. Org. Chem.* **2004**, *69*, 2185.
12. Pannecoucke, X.; Outurquin, F.; Paulmier, C. *Eur. J. Org. Chem.* **2002**, 995.
13. Sidduri, A.; Rozema, M. J.; Knochel, P. *J. Org. Chem.* **1993**, *58*, 2694.
14. Yamanaka, M.; Nishida, A.; Nakagawa, M. *J. Org. Chem.* **2003**, *68*, 3112.
15. Shimada, S-i.; Ohga, M.; Mitani, J.; Nokami, J. *J. Am. Chem. Soc.* **2000**, *122*, 1310.
16. Takaki, K.; Kusudo, T.; Uebori, S.; Nishiyama, T.; Kameta, T.; Yokoyama, M.; Takehira, K.; Makioka, Y.; Fujiwara, Y. *J. Org. Chem.* **1998**, *63*, 4299.
